# Supplementary material
Source: MDPI journal article supplement (https://www.mdpi.com/2076-3417/12/1/190)
Supplement: s1 [file s1]

Supplementary information to the paper

## Phase Formation and properties of YSZ-rGO composite ceramics sintered in power bed based on silicon carbide

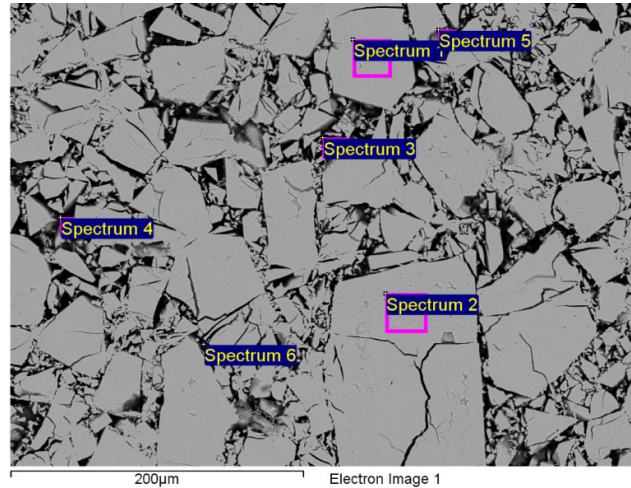

**Figure S1.** SEM image of the cross-section of Z0 sample with pointed areas where EDX spectra were collected.

**Table S1.** Distribution of elements in Z0 sample according to taken EDX spectra (in atomic %).

| Spectrum   | In stats. | C     | O     | Cl   | Ni   | Y    | Zr    |
|------------|-----------|-------|-------|------|------|------|-------|
| Spectrum 1 | Yes       |       | 68.81 |      |      | 4.13 | 27.06 |
| Spectrum 2 | Yes       |       | 68.35 |      |      | 4.69 | 26.96 |
| Spectrum 3 | Yes       | 81.65 | 15.14 |      |      |      | 3.21  |
| Spectrum 4 | Yes       | 85.36 | 12.77 | 0.18 |      |      | 1.70  |
| Spectrum 5 | Yes       | 73.01 | 21.80 |      | 0.16 | 0.83 | 4.20  |
| Spectrum 6 | Yes       |       | 68.63 | 5.94 |      |      | 25.44 |

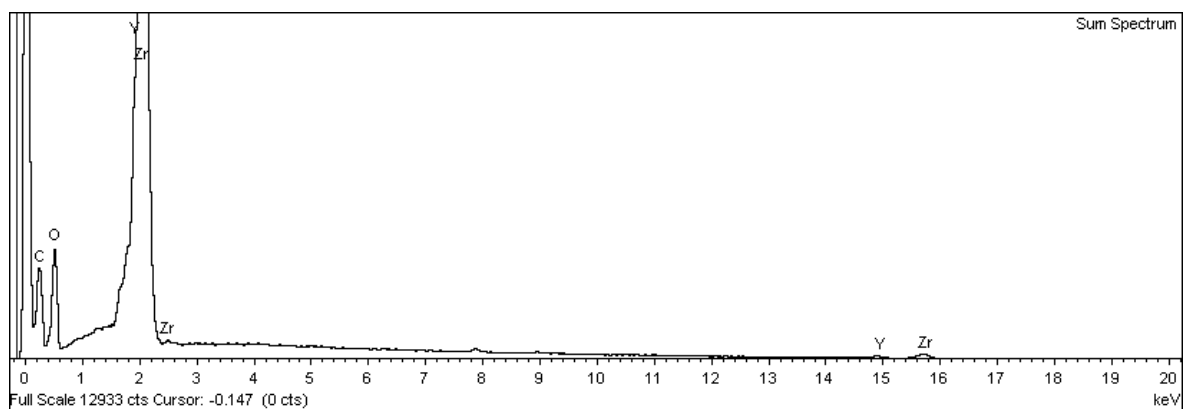

**Figure S2.** EDX spectrum of cross section of Z0 sample.

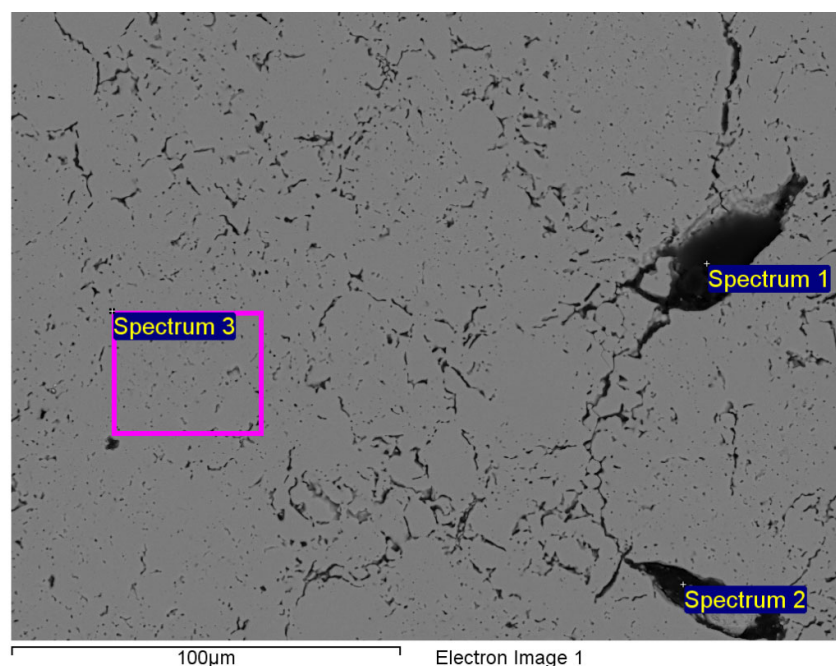

**Figure S3.** SEM image of the cross-section of sample Z2 with pointed areas where EDX spectra were collected.

**Table S2.** Distribution of elements in sample Z2 according to taken EDX spectra (in atomic %).

| Spectrum   | In stats. | C     | O     | Cl   | Ni   | Y    | Zr    |
|------------|-----------|-------|-------|------|------|------|-------|
| Spectrum 1 | Yes       | 79.83 | 18.57 | 0.10 |      |      | 1.50  |
| Spectrum 2 | Yes       | 66.81 | 30.22 |      | 0.81 |      | 2.15  |
| Spectrum 3 | Yes       |       | 67.69 |      |      | 5.18 | 27.13 |

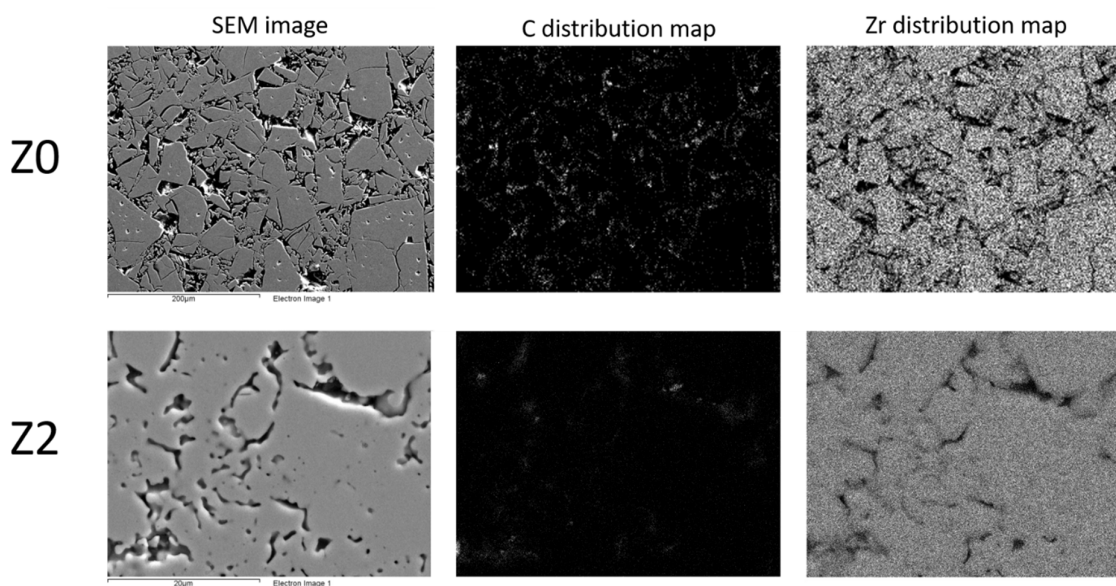

**Figure S4.** SEM image of Z0 ceramics bulk and carbon, and zirconium elemental distribution maps.

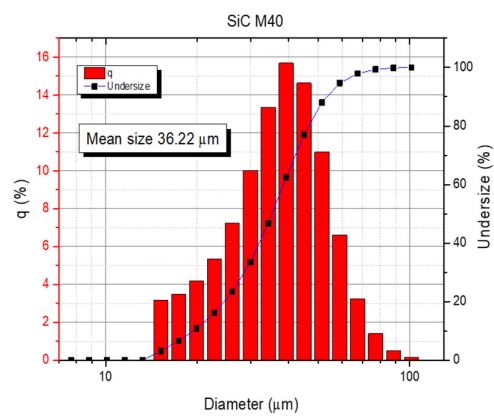

**Figure S5.** Particle size distribution of used in powder bed SiC measured by dynamic light scattering method.
